# Supplementary material
Source: ML conference proceedings conference paper supplement (https://openaccess.thecvf.com/content/ICCV2023/html/Herath_Energy-based_Self-Training_and_ICCV_2023_paper.html)
Supplement: Supplementary file 1 [file Herath_Energy-based_Self-Training_and_ICCV_2023_supplemental.pdf]

# Supplementary Material: Energy-based Self-Training and Normalization for Unsupervised Domain Adaptation

Samitha Herath<sup>1†</sup> Basura Fernando<sup>2</sup> Ehsan Abbasnejad<sup>3</sup> Munawar Hayat<sup>1</sup> Shahram Khadivi<sup>4</sup>  
Mehrtash Harandi<sup>1</sup> Hamid Rezatofghi<sup>1</sup> Gholamreza Haffari<sup>1</sup>

<sup>1</sup> Monash University, Australia <sup>2</sup> A\*STAR, Singapore <sup>3</sup> The University of Adelaide, Australia <sup>4</sup> eBay Inc.

<sup>†</sup>samitha.herath1@monash.edu

## 1. Dataset Details

We conduct our experiments on DomainNet [6], OfficeHome [11] and VISDA2017 [7] datasets. For all our experiments we follow the protocol explained in [9].

**DomainNet** [6]. DomainNet is a large scale UDA benchmark for image classification task. The original DomainNet contains 0.6 million images, 6 domains and 345 classes. However, due to labeling noise, most recent work [8, 9] has adopted a cleaned version containing 40 commonly seen classes from 4 domains. We use this cleaned version of the DomainNet dataset for our experiments as in [8]. **VISDA2017** [7]. VISDA2017 is a large scale dataset with the domain transfer synthetic→ real. The dataset contains 12 classes and over 200K images. **OfficeHome** [11]. The OfficeHome dataset comprises 12 domain shifts, with each shift containing 65 classes observed in both home and office settings from 4 domains.

## 2. Scalability of SCAL+SCON to CNNs

While our proposed self-training method is entirely centered around ViT backbone, the SCAL+SCON modules are applicable to the CNN architecture (*i.e.*, ResNet50 [3]). In Table 1, we compare the performance when energy alignment and our normalization modules are used for distribution alignment. For this comparison, we use results for PADA [1] and DANN [2] reported in SENTRY [8]. Note, as in the case of SENTRY we compute the per-class-mean-accuracy as the evaluation metric. It can be seen that our method outperforms the considered adversarial methods.

## 3. Summary of Training Hyper-parameters

**Optimizer parameters.** We use AdamW [5] optimizer with a fixed learning rate of  $2 \times 10^{-4}$  with a mini-batch size of 512. For all OfficeHome [11] and DomainNet [6] we report results after 300 epochs of training. For VISDA2017 experiments, we report results after 20 epochs.

**SEEBs+ parameters.** We keep the loss weights,  $\alpha_u = \alpha_{ea} = \alpha_n = 0.1$  constant for all experiments (*see* Overall training loss provided in the main text). We find the normalizer module parameter  $\lambda = 0.01$  (*see* equation (15) of the main text) works best for DomainNet and OfficeHome experiments. For all other experiments we use  $\lambda = 0.1$ . In Fig. 1 we provide a

| Method    | Re2Cl       | Cl2Pa       | Pa2Re       | Sk2Re       |
|-----------|-------------|-------------|-------------|-------------|
| Source    | 65.8        | 60.6        | 84.5        | 77.1        |
| PADA [1]  | 65.9        | 53.1        | 79.8        | 76.5        |
| DANN [2]  | 63.4        | 65.7        | 86.9        | 85.7        |
| SCON+SCAL | <b>78.0</b> | <b>73.8</b> | <b>89.7</b> | <b>87.6</b> |

Table 1. SCAL/SCON modules for CNNs. Here, we compare the effectiveness of our proposed SCAL/SCON modules against other distribution alignment methods in CNN architecture.

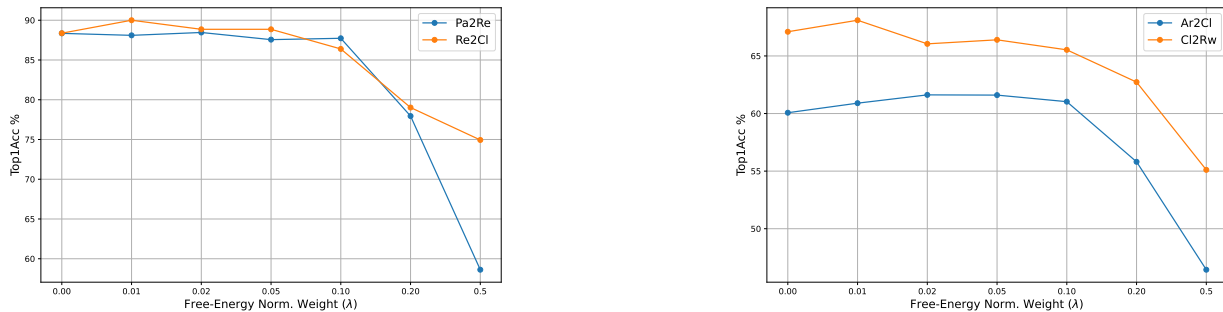

Figure 1. Sensitivity of the proposed **SEEBS+** method to the free-energy normalization weight  $\lambda$  *see* equation (15) of the main text. Here, we report the sensitivity analysis on two domain sets per each DomainNet (**Left**) and OfficeHome (**Right**) datasets.

| Dataset    | SOTA<br>(i.e., PACMAC [9]) | Ours | Relative<br>Imp.% |
|------------|----------------------------|------|-------------------|
| OfficeHome | 66.3                       | 68.5 | +3.3              |
| DomainNet  | 81.5                       | 83.3 | +2.2              |
| VISDA2017  | 77.1                       | 79.5 | +3.1              |

Table 2. Overall improvement from state-of-the-art UDA methods.

| Ar2Cl | Ar2Pr | Ar2Rw | Cl2Ar | Cl2Pr | Cl2Rw | Pr2Ar | Pr2Cl | Pr2Rw | Rw2Ar | Rw2Cl | Rw2Pr |
|-------|-------|-------|-------|-------|-------|-------|-------|-------|-------|-------|-------|
| 0.09  | 1.11  | 0.09  | 0.35  | 0.16  | 0.23  | 0.36  | 0.09  | 0.46  | 0.17  | 0.14  | 0.46  |
| Re2Cl | Re2Pa | Re2Sk | Cl2Re | Cl2Pa | Cl2Sk | Pa2Re | Pa2Cl | Pa2Sk | Sk2Re | Sk2Cl | SkPa  |
| 0.49  | 0.31  | 0.72  | 0.77  | 0.27  | 0.31  | 0.41  | 0.48  | 0.23  | 0.34  | 0.41  | 0.40  |

Table 3. Standard deviation of **top-1 accuracy** for **SEEBS+** on three different runs with different random seeds.

sensitivity analysis on the free-energy normalization weight,  $\lambda$ . Here, we report the sensitivity analysis on two domain sets from DomainNet (**Left**) and OfficeHome (**Right**) datasets.

#### 4. Overall Improvement

In Table 2, we report the relative improvement from our method compared to state-of-the-art UDA methods. As such, we compare with PACMAC [9]. We observe that our proposed method **SEEBS+** achieves a significant 2.2% - 3.3% relative improvement in comparison to PACMAC.

In Table 3, we report the standard deviation of the top-1 accuracy for the proposed **SEEBS+** for OfficeHome [11] (top row) and DomainNet [6] (bottom row), based on three separate runs with different random seeds. In almost all cases, the standard deviation is less than 1.0, with the exception of the **Ar2Pr** set in OfficeHome. However, it is worth noting that we outperform state-of-the-art methods in the **Ar2Pr** domain set by a margin of 2.5 in top-1 accuracy. Therefore, we claim that **SEEBS+** is a method with consistent improvements over state-of-the-art UDA methods.

#### 5. Quality of Instance Selections

In Fig. 2 we show the number of instances used for self-training as a proportion of the batch-size for each iteration. It can be seen that **SEEBS+** outperforms PACMAC (*see* Table 2 of the main text) while using a significantly lower number of training instances for self-training. We attribute this observation to the better quality instance selections from **SEEBS+**.

To quantitatively evaluate the quality of instance selections, we compute the precision of our instance selections. More specifically, we compare them to ground truth instance selections where pseudo-labels are correct.

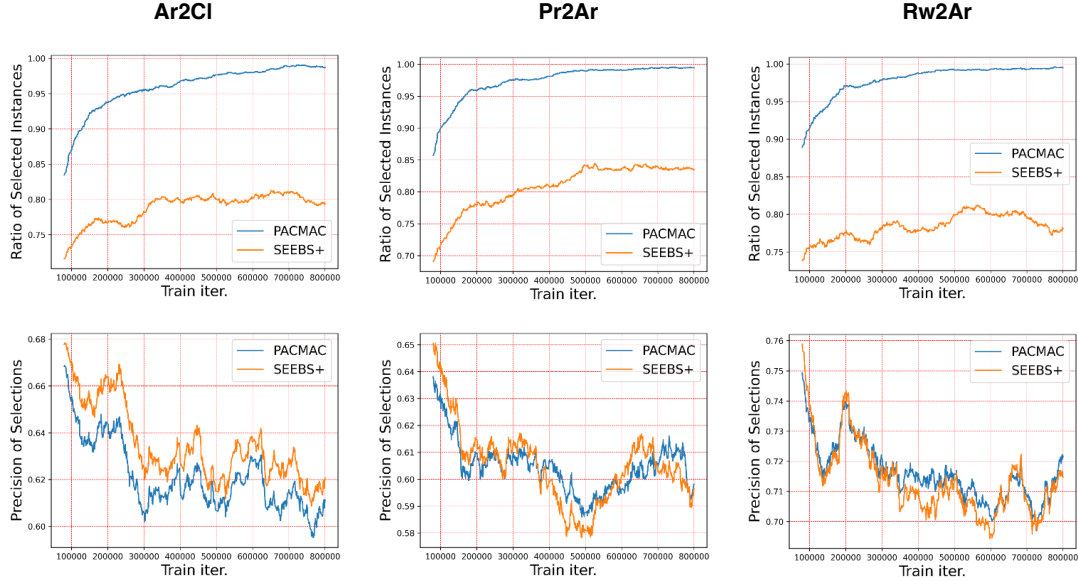

Figure 2. Here we compare the proportion and the quality of instance selections for PACMAC and SEEBS+. SEEBS+ outperform PACMAC [9] even with a significantly less number of instance selections (*see* Table 2 of the main text). We attribute this to the better quality of instance selections as shown by the precision plots.

Our analysis shows that, for a significant portion of the training, our proposed method, SEEBS+, exhibits better precision in instance selection than PACMAC. This is particularly evident in the early stages of training. This is important since a noisy self-training signal in the initial stages may cause the model to converge to an unfavorable local optimum. Previous research has emphasized the importance of steady self-training on the target domain during the early iterations of UDA. For instance, Dirt-t [10] proposes a constrained optimization technique for better self-supervision during early iterations. In our case, we improve the self-training by making reliable instance selections for the self-training objective.

## 6. Expanded Ablation Tables

Here, we present the expanded versions of the ablation experiments originally discussed in the main paper. In Table 4 we report the full domain set results demonstrating the significance of using the **Joint.** distribution-based instance sampling method.

In Table 5 we present an extended ablation experiment on the instance selection approach. This experiment serves to validate our instance selection approach explained in equation (4) of the main text.

In Table 6 we report the expanded set of experiments showing the significance of the SCON module when used for free-energy alignment (*i.e.*, SCAL + SCON).

In Table 7 we provide a comparison of the case when a naive normalization (*i.e.*, BatchNorm [4]) is used instead of the proposed SCON module. As per the expanded ablation tables, our choices proposed in this paper can be seen to perform better in a majority of domain sets.

|        | Re2Cl       | Re2Pa       | Re2Sk       | Cl2Re       | Cl2Pa       | Cl2Sk       | Pa2Re       | Pa2Cl       | Pa2Sk       | Sk2Re       | Sk2Cl       | Sk2Pa       | AVG         |
|--------|-------------|-------------|-------------|-------------|-------------|-------------|-------------|-------------|-------------|-------------|-------------|-------------|-------------|
| Cond.  | 87.8        | 82.7        | 77.7        | 78.7        | 73.6        | 76.1        | 88.2        | 83.5        | 77.8        | 83.6        | 82.6        | 78.6        | <b>80.9</b> |
| Marg.  | 86.5        | 82.1        | 77.2        | 85.0        | 73.3        | 73.9        | 88.2        | 81.0        | 76.3        | 84.3        | 82.4        | 78.9        | <b>80.7</b> |
| Joint. | 87.1        | <b>82.9</b> | <b>78.3</b> | <b>85.5</b> | <b>75.5</b> | <b>76.6</b> | 87.8        | 82.7        | <b>78.1</b> | 82.5        | <b>82.7</b> | 78.0        | <b>81.5</b> |
|        | Ar2Cl       | Ar2Pa       | Ar2Rw       | Cl2Ar       | Cl2Pr       | Cl2Rw       | Pr2Ar       | Pr2Cl       | Pr2Rw       | Rw2Ar       | Rw2Cl       | Rw2Pr       | AVG         |
| Cond.  | 60.4        | 64.7        | 74.6        | 60.5        | 69.1        | 66.7        | 56.7        | 58.5        | 74.2        | 70.6        | 63.8        | 81.3        | <b>66.8</b> |
| Marg.  | 58.3        | 65.0        | 73.9        | 58.9        | 68.0        | 66.7        | 56.4        | 57.4        | 72.9        | 70.1        | 63.9        | 81.7        | <b>66.1</b> |
| Joint. | <b>61.3</b> | <b>65.2</b> | 74.0        | 60.4        | <b>69.6</b> | <b>67.3</b> | <b>57.2</b> | <b>59.1</b> | 73.9        | <b>70.9</b> | <b>64.7</b> | <b>82.0</b> | <b>67.1</b> |

Table 4. Expanded version of our analysis on self-training instance selection methods following conditional, marginal, and joint distributions.

|                | Re2Cl       | Re2Pa       | Re2Sk       | Cl2Re       | Cl2Pa       | Cl2Sk       | Pa2Re       | Pa2Cl       | Pa2Sk       | Sk2Re       | Sk2Cl       | Sk2Pa       | AVG         |
|----------------|-------------|-------------|-------------|-------------|-------------|-------------|-------------|-------------|-------------|-------------|-------------|-------------|-------------|
| Sel-high       | 86.8        | 81.6        | 77.6        | 86.2        | 73.9        | 75.8        | 87.5        | 81.9        | 77.9        | 83.8        | 82.1        | 77.7        | <b>81.1</b> |
| Sel-low        | 86.5        | 82.1        | 77.2        | 85.0        | 73.3        | 73.9        | 88.2        | 81.0        | 76.3        | 84.3        | 82.4        | 78.9        | <b>80.7</b> |
| Joint-sel-high | 86.3        | 82.3        | 77.7        | 77.4        | 72.0        | 75.2        | 87.9        | 80.0        | 78.3        | 84.2        | 82.1        | 77.5        | <b>80.1</b> |
| Joint-sel-low  | <b>87.1</b> | <b>82.9</b> | <b>78.3</b> | <b>85.5</b> | <b>75.5</b> | <b>76.6</b> | 87.8        | <b>82.7</b> | 78.1        | 82.5        | <b>82.7</b> | 78.0        | <b>81.5</b> |
|                | Ar2Cl       | Ar2Pr       | Ar2Rw       | Cl2Ar       | Cl2Pr       | Cl2Rw       | Pr2Ar       | Pr2Cl       | Pr2Rw       | Rw2Ar       | Rw2Cl       | Rw2Pr       | AVG         |
| Sel-high       | 59.8        | 66.3        | 73.4        | 59.3        | 68.1        | 66.1        | 56.4        | 58.4        | 72.9        | 70.0        | 64.2        | 81.8        | <b>66.4</b> |
| Sel-low        | 58.3        | 65.0        | 74.1        | 59.3        | 68.0        | 66.7        | 56.4        | 57.4        | 72.9        | 70.1        | 63.9        | 81.7        | <b>66.1</b> |
| Joint-sel-high | 59.3        | 66.6        | 73.9        | 58.8        | 68.7        | 66.4        | 56.4        | 58.7        | 73.7        | 70.3        | 64.2        | 81.8        | <b>66.6</b> |
| Joint-sel-low  | <b>61.3</b> | 65.2        | 74.0        | <b>60.4</b> | <b>69.6</b> | <b>67.3</b> | <b>57.2</b> | <b>59.1</b> | <b>73.9</b> | <b>70.9</b> | <b>64.7</b> | <b>82.0</b> | <b>67.1</b> |

Table 5. Expanded version of our analysis on the impact of using instances that meet the proposed free-energy based instance selection condition.

|           | Re2Cl       | Re2Pa       | Re2Sk       | Cl2Re       | Cl2Pa       | Cl2Sk       | Pa2Re       | Pa2Cl       | Pa2Sk       | Sk2Re       | Sk2Cl       | Sk2Pa       | AVG         |
|-----------|-------------|-------------|-------------|-------------|-------------|-------------|-------------|-------------|-------------|-------------|-------------|-------------|-------------|
| Source    | 71.0        | 77.6        | 62.9        | 73.7        | 61.5        | 63.3        | 82.4        | 63.1        | 66.1        | 76.6        | 71.9        | 69.6        | <b>70.1</b> |
| OnlySCAL  | 82.7        | 79.1        | 74.1        | 79.9        | 69.3        | 72.2        | 83.2        | 78.3        | 75.5        | 80.0        | 78.5        | 73.4        | <b>77.2</b> |
| OnlySCON  | 65.3        | 46.3        | 42.7        | 44.0        | 30.7        | 41.1        | 52.2        | 51.6        | 43.6        | 42.4        | 58.1        | 38.4        | <b>46.4</b> |
| SCAL+SCON | <b>88.6</b> | <b>81.7</b> | <b>80.5</b> | <b>86.0</b> | <b>79.1</b> | <b>76.8</b> | <b>86.9</b> | <b>80.8</b> | <b>79.0</b> | <b>84.1</b> | <b>82.7</b> | <b>79.0</b> | <b>82.1</b> |
|           | Ar2Cl       | Ar2Pr       | Ar2Rw       | Cl2Ar       | Cl2Pr       | Cl2Rw       | Pr2Ar       | Pr2Cl       | Pr2Rw       | Rw2Ar       | Rw2Cl       | Rw2Pr       | AVG         |
| Source    | 46.7        | 57.6        | 71.0        | 51.1        | 60.0        | 62.6        | 51.4        | 46.9        | 70.5        | 66.3        | 52.2        | 77.2        | <b>59.4</b> |
| OnlySCAL  | 55.3        | 60.4        | 73.2        | 57.4        | 65.9        | 64.2        | 52.5        | 56.7        | 66.3        | 67.9        | 58.9        | 79.9        | <b>63.2</b> |
| OnlySCON  | 51.3        | 55.6        | 69.8        | 39.5        | 44.1        | 40.1        | 44.3        | 36.9        | 50.7        | 64.9        | 48.1        | 65.4        | <b>50.9</b> |
| SCAL+SCON | <b>60.5</b> | <b>67.7</b> | <b>74.9</b> | <b>62.1</b> | <b>68.8</b> | <b>68.0</b> | <b>60.9</b> | <b>60.2</b> | <b>75.4</b> | <b>71.5</b> | <b>66.9</b> | <b>81.9</b> | <b>68.2</b> |

Table 6. Expanded version of the evaluation of the effects of the SCAL and SCON. Our results indicate that incorporating the normalization process, SCON, results in significant improvements.

|             | Re2Cl       | Re2Pa       | Re2Sk       | Cl2Re       | Cl2Pa       | Cl2Sk       | Pa2Re       | Pa2Cl       | Pa2Sk       | Sk2Re       | Sk2Cl       | Sk2Pa       | AVG         |
|-------------|-------------|-------------|-------------|-------------|-------------|-------------|-------------|-------------|-------------|-------------|-------------|-------------|-------------|
| naiveSEEBs+ | 86.6        | 81.8        | 78.8        | 85.9        | 72.9        | 77.0        | 87.5        | 81.9        | 78.4        | 86.1        | 83.5        | 76.0        | <b>81.4</b> |
| SEEBs+      | <b>90.0</b> | <b>83.8</b> | <b>80.2</b> | <b>87.2</b> | <b>79.3</b> | <b>78.3</b> | <b>88.1</b> | <b>83.9</b> | <b>79.8</b> | 84.6        | <b>84.5</b> | <b>80.6</b> | <b>83.3</b> |
|             | Ar2Cl       | Ar2Pr       | Ar2Rw       | Cl2Ar       | Cl2Pr       | Cl2Rw       | Pr2Ar       | Pr2Cl       | Pr2Rw       | Rw2Ar       | Rw2Cl       | Rw2Pr       | AVG         |
| naiveSEEBs+ | 61.0        | 66.0        | 74.6        | 62.4        | 71.6        | 69.0        | 58.6        | 59.4        | 74.8        | 70.8        | 66.1        | 81.7        | <b>68.0</b> |
| SEEBs+      | 60.9        | <b>68.1</b> | <b>75.3</b> | 62.1        | 68.7        | 68.1        | <b>60.6</b> | <b>60.0</b> | <b>75.7</b> | <b>72.2</b> | <b>68.2</b> | <b>82.0</b> | <b>68.5</b> |

Table 7. Expanded version of the reported comparisons on the effect of applying a BatchNorm instead of SCON.

## References

- [1] Zhangjie Cao, Lijia Ma, Mingsheng Long, and Jianmin Wang. Partial adversarial domain adaptation. In *Proceedings of the European conference on computer vision (ECCV)*, pages 135–150, 2018. 1
- [2] Yaroslav Ganin and Victor Lempitsky. Unsupervised domain adaptation by backpropagation. In *Proc. Int. Conference on Machine Learning (ICML)*, pages 1180–1189, 2015. 1
- [3] Kaiming He, Xiangyu Zhang, Shaoqing Ren, and Jian Sun. Deep residual learning for image recognition. In *Proc. IEEE Conference on Computer Vision and Pattern Recognition (CVPR)*, pages 770–778, 2016. 1
- [4] Sergey Ioffe and Christian Szegedy. Batch normalization: Accelerating deep network training by reducing internal covariate shift. In *Proc. Int. Conference on Machine Learning (ICML)*, pages 448–456, 2015. 3

- [5] Ilya Loshchilov and Frank Hutter. Decoupled weight decay regularization. *arXiv preprint arXiv:1711.05101*, 2017. [1](#)
- [6] Xingchao Peng, Qinxun Bai, Xide Xia, Zijun Huang, Kate Saenko, and Bo Wang. Moment matching for multi-source domain adaptation. In *Proc. Int. Conference on Computer Vision (ICCV)*, pages 1406–1415, 2019. [1](#), [2](#)
- [7] Xingchao Peng, Ben Usman, Neela Kaushik, Judy Hoffman, Dequan Wang, and Kate Saenko. Visda: The visual domain adaptation challenge. *arXiv preprint arXiv:1710.06924*, 2017. [1](#)
- [8] Viraj Prabhu, Shivam Khare, Deeksha Kartik, and Judy Hoffman. Sentry: Selective entropy optimization via committee consistency for unsupervised domain adaptation. In *Proc. Int. Conference on Computer Vision (ICCV)*, pages 8558–8567, 2021. [1](#)
- [9] Viraj Prabhu, Sriram Yenamandra, Aaditya Singh, and Judy Hoffman. Adapting self-supervised vision transformers by probing attention-conditioned masking consistency. In *Proc. Neural Information Processing Systems (NeurIPS)*, pages 23271–23283, 2022. [1](#), [2](#), [3](#)
- [10] Rui Shu, Hung Bui, Hirokazu Narui, and Stefano Ermon. A DIRT-t approach to unsupervised domain adaptation. In *Proc. Int. Conference on Learning Representations (ICLR)*, 2018. [3](#)
- [11] Hemanth Venkateswara, Jose Eusebio, Shayok Chakraborty, and Sethuraman Panchanathan. Deep hashing network for unsupervised domain adaptation. In *Proc. IEEE Conference on Computer Vision and Pattern Recognition (CVPR)*, pages 5018–5027, 2017. [1](#), [2](#)
